# Supplementary material for: cis-Platinum pro-drug-attached CuFeS2 nanoplates for in vivo photothermal/photoacoustic imaging and chemotherapy/photothermal therapy of cancer
Source: Royal Society of Chemistry journal article supplement (doi:10.1039/c7nr04166g), 2017-01-01
Supplement: c7nr04166g1.pdf [file c7nr04166g1.pdf]

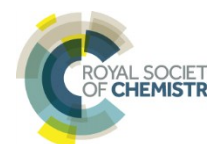

Journal Name

ARTICLE

**Electronic Supporting Information**

**Cis-platinum Pro-Drug-Attached CuFeS<sub>2</sub> Nanoplates for *In Vivo*  
Photothermal/Photoacoustic Imaging and  
Chemotherapy/Photothermal Therapy of Cancer**

Binbin Ding<sup>a,e</sup>, Chang Yu<sup>a,f</sup>, Chunxia Li<sup>\*,b</sup>, Xiaoran Deng<sup>a,f</sup>, Jianxun Ding<sup>c</sup>, Ziyong Cheng<sup>a</sup>, Bengang Xing<sup>d</sup>,  
Ping'an Ma<sup>\*,a</sup>, Jun Lin<sup>\*,a</sup>

<sup>a</sup> State Key Laboratory of Rare Earth Resource Utilization, Changchun Institute of Applied Chemistry, Chinese Academy of Sciences, Changchun, 130022, China.

<sup>b</sup> Institute of Physical Chemistry, Zhejiang Normal University, Jinhua, Zhejiang, 321004, China.

<sup>c</sup> Key Laboratory of Polymer Ecomaterials, Changchun Institute of Applied Chemistry, Chinese Academy of Sciences, Changchun 130022, China.

<sup>d</sup> School of Physical & Mathematical Sciences, Nanyang Technological University, Singapore.

<sup>e</sup> University of Science and Technology of China, Hefei, 230026, China.

<sup>f</sup> University of Chinese Academy of Sciences, Beijing, 100049, China.

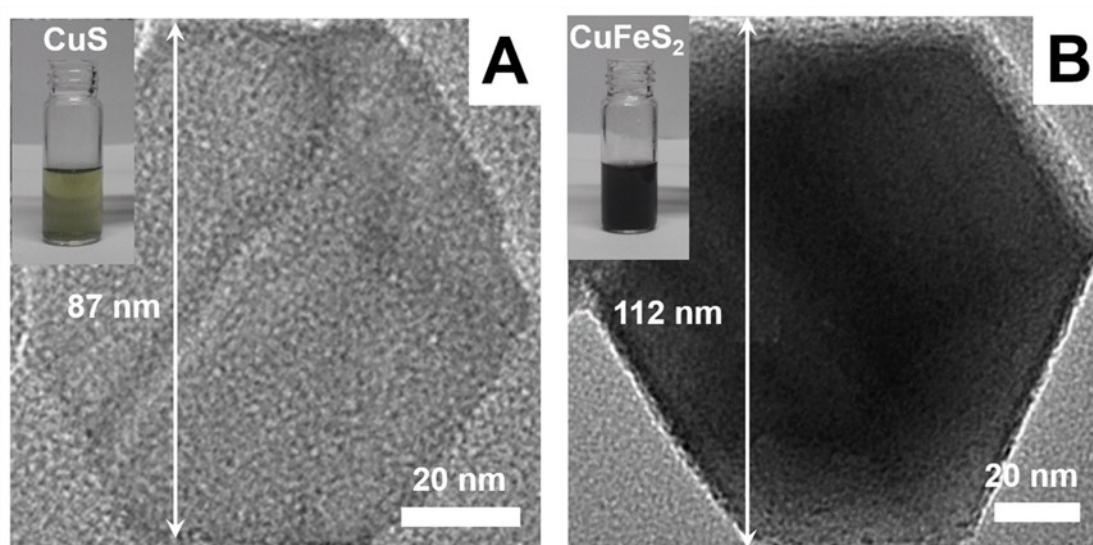

**Figure S1.** TEM images of OLE coated CuS NPs (A), CuFeS<sub>2</sub> NPs (B). Digital photographs of CuS NPs dispersed in toluene, CuFeS<sub>2</sub> NPs dispersed in toluene (inserts of A and B).

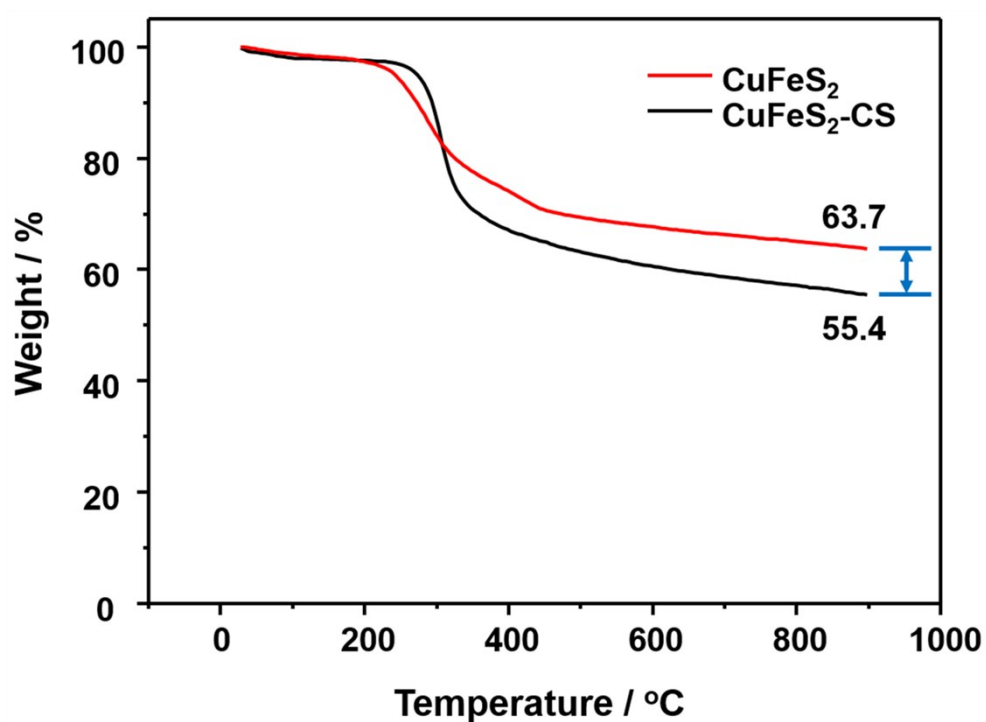

**Figure S2.** Thermogravimetric analysis (TGA) of a dried sample of CuFeS<sub>2</sub> and CuFeS<sub>2</sub>-CS in the temperature range from room temperature to 800 °C at a heating rate of 10 °C/min in nitrogen.

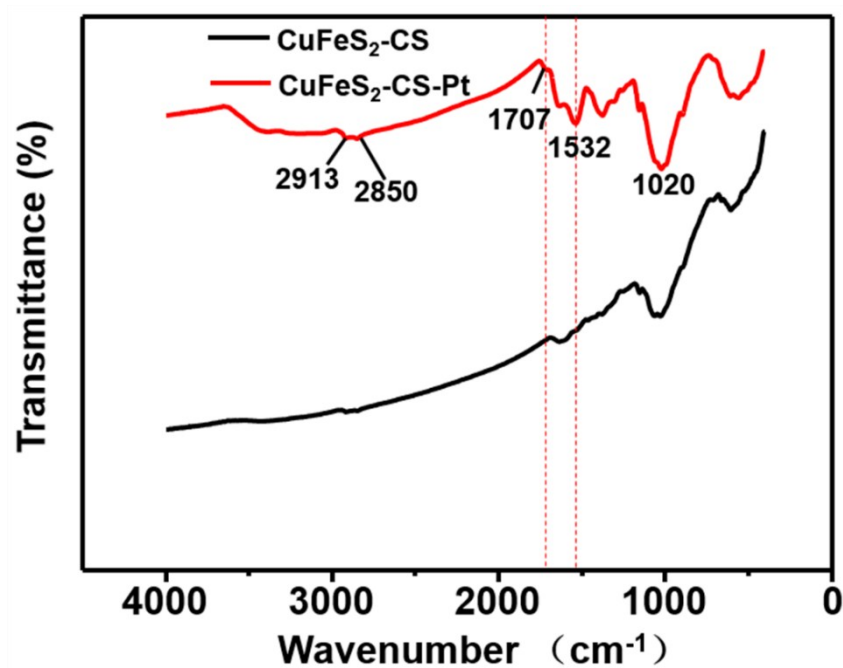

**Figure S3.** FT-IR spectra of CuFeS<sub>2</sub>-CS and CuFeS<sub>2</sub>-CS-Pt, respectively. The -CH<sub>2</sub>-strength vibration (2840-2960 cm<sup>-1</sup>) and -C-C- (1020 cm<sup>-1</sup>) of CS molecules were observed in the FT-IR. After cis-platinum pro-drug was further attached the CuFeS<sub>2</sub>-CS NPs, the additional absorption band were observed at 1707 and 1532 cm<sup>-1</sup>, which was attributed to the C=O, and -NH<sub>2</sub> of amido bond.<sup>1</sup> These observations further confirmed the successful loading of trans-platinum pro-drug to CuFeS<sub>2</sub>-CS-NPs.

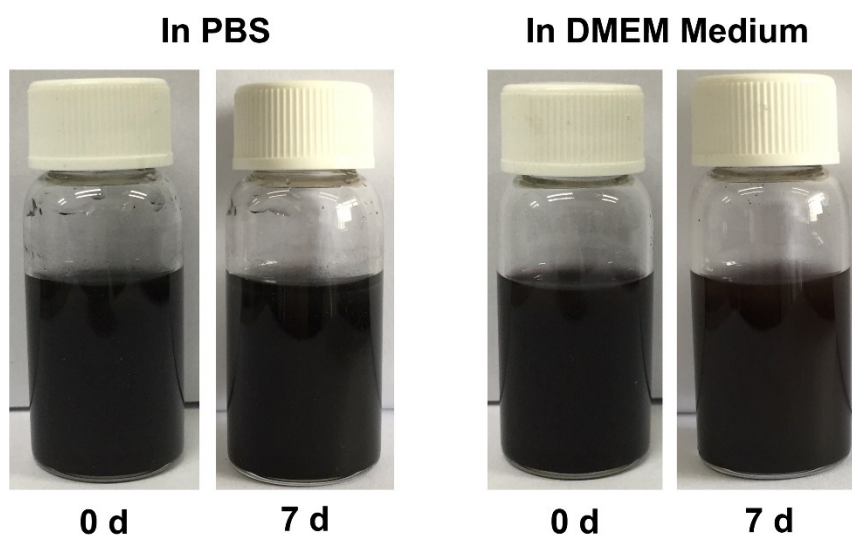

**Figure S4.** Digital photographs for the dispersion status of CuFeS<sub>2</sub>-CS dispersed in PBS and DMEM medium at least 7 days, concentration = 1 mM.

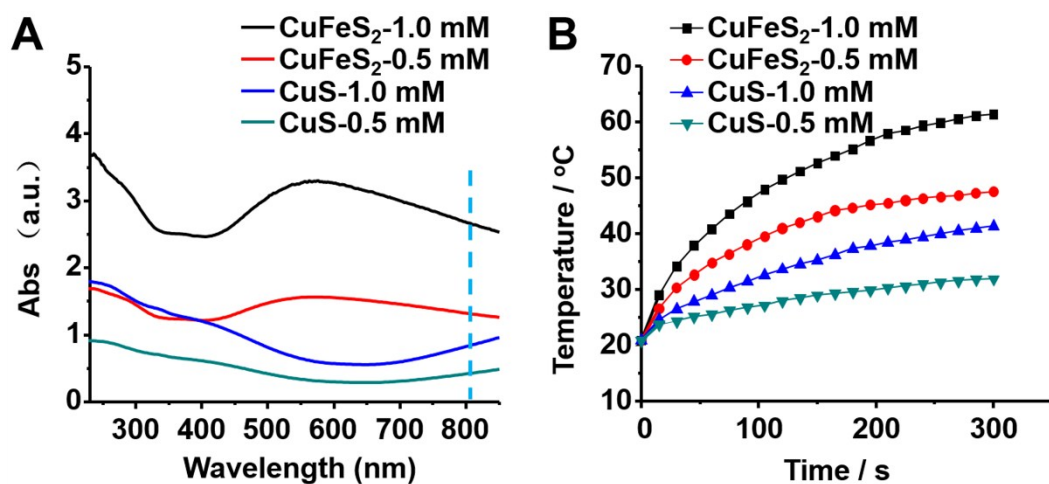

**Figure S5.** (A) UV-vis-NIR absorption spectra of  $\text{CuS-CS}$  and  $\text{CuFeS}_2\text{-CS}$  dispersed in water at varying  $\text{Cu}^{2+}$  concentrations (0.5 and 1 mM). (B) Temperature increase of  $\text{CuS-CS}$  and  $\text{CuFeS}_2\text{-CS}$  at varying  $\text{Cu}^{2+}$  concentrations (0.5 and 1 mM, 200  $\mu\text{L}$ ) under laser irradiation (808 nm, 1  $\text{W}/\text{cm}^2$ ) as a function of time (0-300 s).

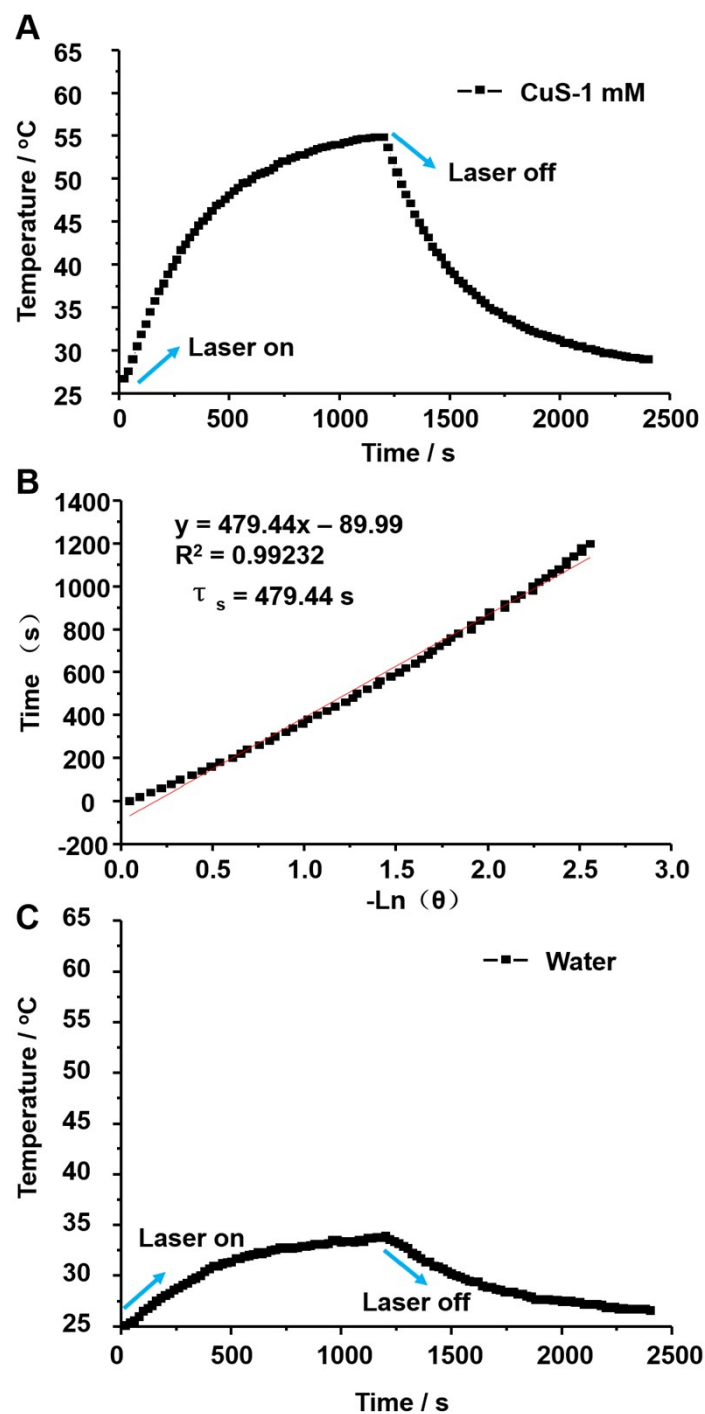

**Figure S6.** (A) Photothermal effect of a CuS-CS aqueous solution irradiated with a 808 nm laser, and the laser was shut off after irradiation for 20 min. (B) Plot of cooling period (after 20 min) versus negative natural logarithm of driving force temperature. Time constant ( $\tau_s$ ) for heat transfer from the system is determined to be 479.44 s. (C) Photothermal effect of a pure water irradiated with a 808 nm laser, and the laser was shut off after irradiation for 20 min.

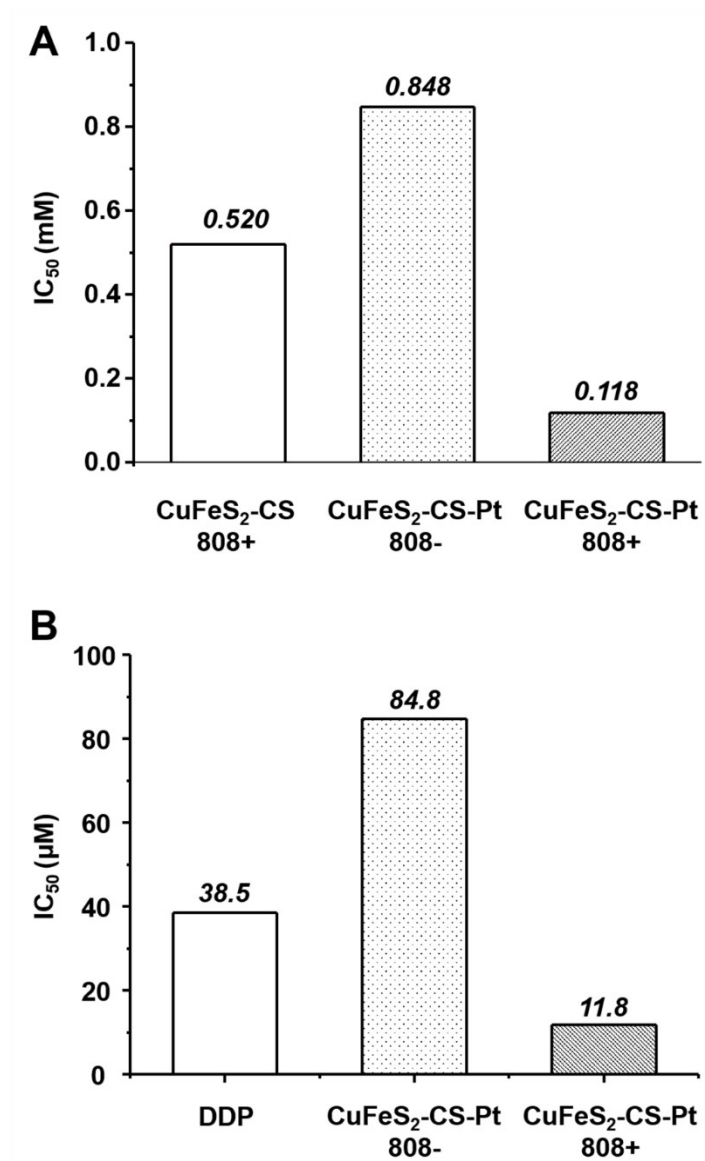

**Figure S7.** (A) The 50% inhibitory concentration (IC<sub>50</sub>, Cu) of different treatments: CuFeS<sub>2</sub>-CS (808+), CuFeS<sub>2</sub>-CS-Pt (808-) and CuFeS<sub>2</sub>-CS-Pt (808+). (B) IC<sub>50</sub> (Pt) of different treatments: DDP, CuFeS<sub>2</sub>-CS-Pt (808-) and CuFeS<sub>2</sub>-CS-Pt (808+).

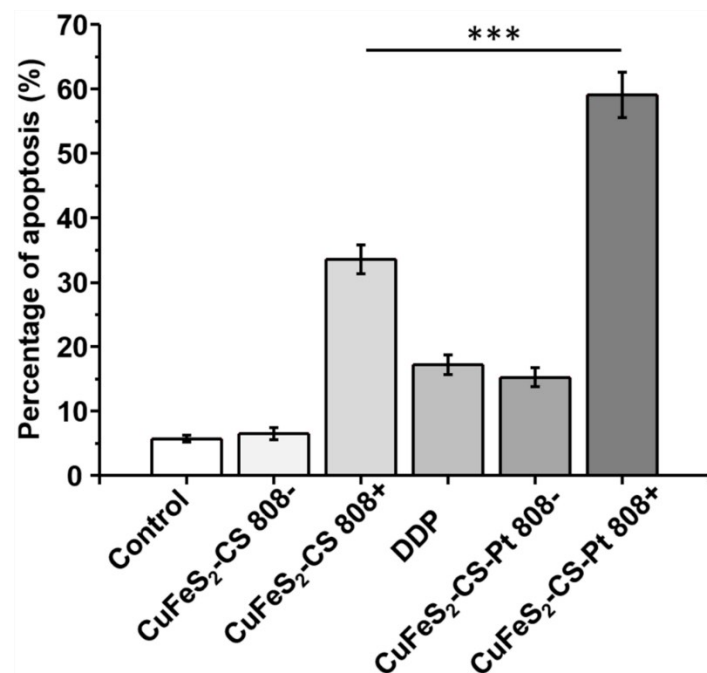

**Figure S8.** Percentage of apoptosis of A549 cells after different treatments (a) control; (b) CuFeS<sub>2</sub>-CS (808-); (c) CuFeS<sub>2</sub>-CS (808+); (d) DDP; (e) CuFeS<sub>2</sub>-CS-Pt (808-); (f) CuFeS<sub>2</sub>-CS-Pt (808+). Analysis of Variance (ANOVA) was used to assess statistical significance. \* $p < 0.05$ , \*\* $p < 0.01$ , \*\*\* $p < 0.001$ .

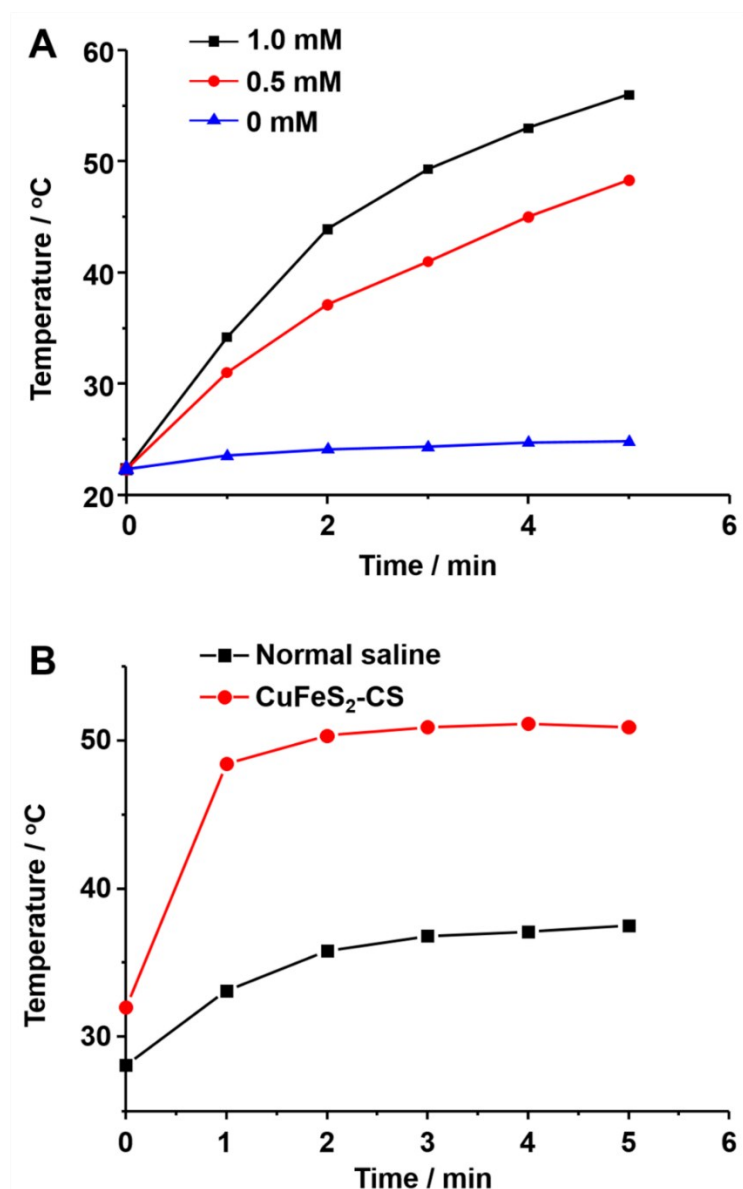

**Figure S9.** Temperature increase of the vitro thermal imaging of an aqueous CuFeS<sub>2</sub>-CS solution (2 mL) with different concentrations (A) and A549-tumor-bearing mice with intratumor injection of normal saline and CuFeS<sub>2</sub>-CS solution (100 μL, 1 mM) (B), exposed to 808 nm laser light (0.5 W/cm<sup>2</sup>) for different times (1, 2, 3, 4 and 5 min).



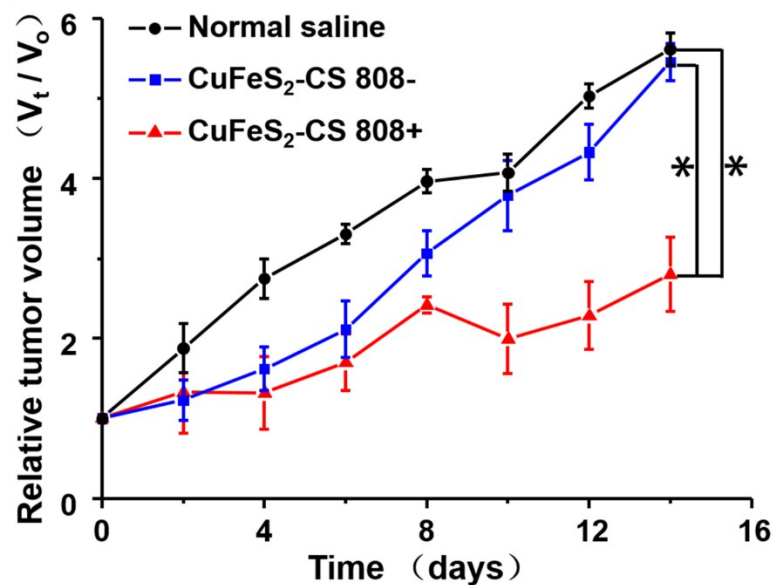

**Figure S10.** Relative tumor growth curves of H22 tumors after various treatments with normal saline as control; CuFeS<sub>2</sub>-CS (808-); CuFeS<sub>2</sub>-CS (808+), respectively. ANOVA was used to assess statistical significance. \*p < 0.05, \*\*p < 0.01, \*\*\*p < 0.001.

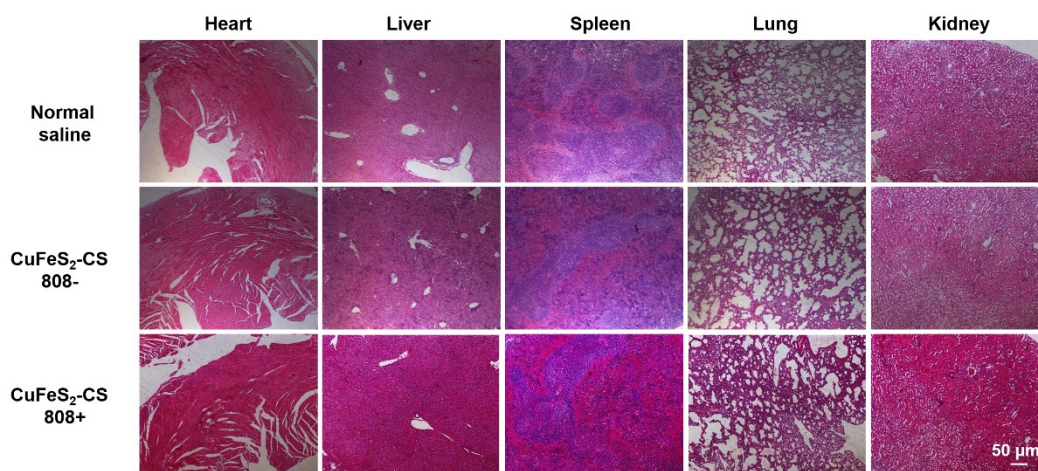

**Figure S11.** Haematoxylin and eosin (H&E) stained images of major organs of BABL/C mice after various treatments with normal saline as control; CuFeS<sub>2</sub>-CS (808-); CuFeS<sub>2</sub>-CS (808+), respectively.

### S12. Photothermal conversion efficiency of CuFeS<sub>2</sub>-CS

To evaluate the photothermal conversion efficiency, a CuFeS<sub>2</sub>-CS NPs solution (1 mM, 1 mL) was heated to a steady temperature with an 808 nm laser at a power density of 1 W cm<sup>-2</sup> and then naturally cooled. The photothermal conversion efficiency was calculated according to the previous literature.<sup>2</sup>

$$\eta = hS (T_{\max} - T_{\max, \text{water}}) / I (1 - 10^{-A}) \quad (1)$$

$$hS = \Sigma m Cp / \tau_s \quad (2)$$

$$\tau_s = -t / \ln \theta \quad (3)$$

$$\theta = (T_{\text{amb}} - T) / (T_{\text{amb}} - T_{\max}) \quad (4)$$

where  $\eta$  is the heat transfer coefficient,  $S$  is the surface area of container, and  $T_{\max}$  and  $T_{\max, \text{water}}$  are the maximum steady temperatures for CuFeS<sub>2</sub>-CS NPs solution and water (66.7 and 33.9 °C, respectively),  $I$  is the incident laser power density (1 W/cm<sup>2</sup>), and  $A$  is the absorbance of NPs solution at 808 nm ( $A = 2.635$ ).  $m$  is the mass (1 g) and  $Cp$  is the heat capacity [ $4.2 \times 10^3$  kJ/(kg • °C)] of water.  $\theta$  is the dimensionless driving force temperature,  $T_{\text{amb}}$  is the ambient temperature, and  $\tau_s$  is the sample system time constant ( $\tau_s = 452.48$  s).

Similarly, photothermal conversion efficiency of CuS-CS was calculated.  $\tau_s$  and  $\eta$  is 479.44 s and 21.4%, respectively.

**Table S1.** Photothermal conversion efficiency of CuFeS<sub>2</sub>-CS and CuS-CS.

|                        | $\Sigma m$ | $Cp$ | $\tau_s$ | $T_{\max} - T_{\max, \text{water}}$ | $I$ | $1 - 10^{-A}$ | $\eta$ |
|------------------------|------------|------|----------|-------------------------------------|-----|---------------|--------|
| CuS-CS                 | 1          | 4.2  | 479.44   | 55.0-33.9                           | 1   | 0.8626        | 21.4%  |
| CuFeS <sub>2</sub> -CS | 1          | 4.2  | 452.48   | 66.7-33.9                           | 1   | 0.9977        | 30.5%  |

**Table S2.** Uptake of Pt and the formed Pt-DNA adducts by ICP-MS.

|                           | Time<br>min | Pt uptake                | Pt-DNA adducts                 |                                 |                 |
|---------------------------|-------------|--------------------------|--------------------------------|---------------------------------|-----------------|
|                           |             | ng/10 <sup>4</sup> cells | Pt<br>pg/10 <sup>4</sup> cells | DNA<br>μg/10 <sup>4</sup> cells | Pt/DNA<br>pg/μg |
| DDP                       | 10          | 0.72                     | 1.37                           | 3.27                            | 0.42            |
|                           |             | 0.83                     | 0.97                           | 4.05                            | 0.24            |
|                           |             | 0.65                     | 1.48                           | 4.51                            | 0.33            |
|                           | 60          | 2.45                     | 12.88                          | 4.93                            | 2.61            |
|                           |             | 1.84                     | 11.23                          | 4.78                            | 2.35            |
|                           |             | 3.01                     | 13.45                          | 5.21                            | 2.58            |
| CuFeS <sub>2</sub> -CS-Pt | 10          | 23.53                    | 0.68                           | 3.86                            | 0.18            |
|                           |             | 20.12                    | 0.82                           | 3.53                            | 0.23            |
|                           |             | 18.76                    | 0.94                           | 3.31                            | 0.28            |
|                           | 60          | 68.76                    | 19.75                          | 3.75                            | 5.27            |
|                           |             | 62.38                    | 16.85                          | 3.52                            | 4.79            |
|                           |             | 74.26                    | 20.12                          | 4.01                            | 5.02            |

1. M.-C. Li and U. R. Cho, *Mater. Lett.*, 2013, **92**, 132-135.
2. F. Mao, L. Wen, C. Sun, S. Zhang, G. Wang, J. Zeng, Y. Wang, J. Ma, M. Gao and Z. Li, *ACS Nano*, 2016, **10**, 11145-11155.
